# Supplementary material for: A Nomogram Based on Preoperative Lipiodol Deposition after Sequential Retreatment with Transarterial Chemoembolization to Predict Prognoses for Intermediate-Stage Hepatocellular Carcinoma
Source: MDPI journal article supplement (doi:10.3390/jpm12091375), 2022-08-25
Supplement: s1 [file s1]

**Table S1.** Predictors of death for patients with intermediate-stage HCC before third TACE.

| Variable                                              | Univariate analysis |           |                | Multivariate analysis |           |                |
|-------------------------------------------------------|---------------------|-----------|----------------|-----------------------|-----------|----------------|
|                                                       | Hazard ratio        | 95% CI    | <i>p</i> value | Hazard ratio          | 95% CI    | <i>p</i> value |
| <b>Before third TACE</b>                              |                     |           |                |                       |           |                |
| Age (yr) < 60/≥ 60                                    | 0.61                | 0.32-1.34 | 0.132          |                       |           |                |
| Sex male/female                                       | 0.65                | 0.12-1.78 | 0.342          |                       |           |                |
| HBsAg status positive/negative                        | 0.34                | 0.24-0.89 | 0.230          |                       |           |                |
| Child-Pugh class A/B                                  | 1.32                | 0.23-1.78 | 0.380          |                       |           |                |
| Largest tumor size (cm) < 5/≥ 5                       | 1.23                | 1.01-3.87 | 0.023          | 1.87                  | 0.43-3.28 | < 0.001        |
| Tumor number ≤3/>3                                    | 1.30                | 1.01-2.89 | 0.012          | 1.87                  | 1.02-3.98 | < 0.001        |
| AFP (IU/mL) < 200/≥ 200                               | 0.62                | 0.21-1.03 | 0.098          |                       |           |                |
| AST (U/L) < 40/≥ 40                                   | 0.54                | 0.27-0.94 | 0.081          |                       |           |                |
| ALT(U/L) < 40/≥ 40                                    | 0.53                | 0.12-0.78 | 0.079          |                       |           |                |
| ALB (g/L) < 35/≥ 35                                   | 1.32                | 0.76-2.89 | 0.032          | 1.45                  | 1.11-1.67 | 0.067          |
| Capsule absent/present                                | 1.78                | 1.87-3.26 | 0.012          | 1.49                  | 0.09-2.76 | 0.098          |
| Up to seven criteria within/beyond                    | 1.65                | 1.14-1.56 | 0.043          | 1.66                  | 1.01-1.87 | 0.089          |
| Pre-TACE-3 lipiodol deposition responder/non-reponder | 1.46                | 0.78-3.88 | 0.019          | 1.42                  | 0.45-3.88 | < 0.001        |

BCLC: Barcelona Clinic Liver Cancer; HBsAg: Hepatitis B surface antigen; AST: Aspartate aminotransferase; ALT : Alanine transaminase; AFP: Alpha fetoprotein; ALB:Albumin.

**Table S2.** Predictors of death for patients with intermediate-stage HCC before fourth TACE.

| Variable                                              | Univariate analysis |            |                | Multivariate analysis |           |                |
|-------------------------------------------------------|---------------------|------------|----------------|-----------------------|-----------|----------------|
|                                                       | Hazard ratio        | 95% CI     | <i>p</i> value | Hazard ratio          | 95% CI    | <i>p</i> value |
| <b>Before fourth TACE</b>                             |                     |            |                |                       |           |                |
| Age (yr) < 60/≥ 60                                    | 0.42                | 0.22-1.02  | 0.821          |                       |           |                |
| Sex male/female                                       | 0.34                | 0.24-1.34  | 0.232          |                       |           |                |
| HBsAg status positive/negative                        | 0.44                | 0.12-0.34  | 0.451          |                       |           |                |
| Child-Pugh class A/B                                  | 1.34                | 0.34-1.34  | 0.345          |                       |           |                |
| Largest tumor size (cm) < 5/≥ 5                       | 1.38                | 1.33-3.32  | 0.012          | 1.26                  | 0.43-2.87 | < 0.001        |
| Tumor number ≤3/>3                                    | 1.34                | 1.34-3.34  | 0.023          | 1.45                  | 1.02-3.36 | < 0.001        |
| AFP (IU/mL) < 200/≥ 200                               | 0.64                | 0.23-1.456 | 0.032          |                       |           |                |
| AST (U/L) < 40/≥ 40                                   | 0.32                | 0.12-0.76  | 0.104          |                       |           |                |
| ALT(U/L) < 40/≥ 40                                    | 0.33                | 0.31-0.98  | 0.321          |                       |           |                |
| ALB (g/L) < 35/≥ 35                                   | 1.23                | 0.34-2.78  | 0.045          |                       |           |                |
| Capsule absent/present                                | 1.34                | 1.32-3.24  | 0.078          |                       |           |                |
| Up to seven criteria within/beyond                    | 1.32                | 1.32-1.78  | 0.032          | 1.34                  | 1.02-1.89 | 0.089          |
| /                                                     |                     |            |                |                       |           |                |
| Pre-TACE-4 lipiodol deposition responder/non-reponder | 1.34                | 0.32-3.45  | 0.028          | 1.32                  | 0.23-3.34 | 0.139          |

BCLC: Barcelona Clinic Liver Cancer; AST: Aspartate aminotransferase; ALT : Alanine transaminase;AFP: Alpha fetoprotein; ALB:Albumin.
